# 1 **Glucose Uptake as an Alternative to Stop-Flow Respirometry for Measuring** 2 **Metabolic Rate in *Danio rerio* Larvae**

3 Bridget L Evans<sup>1\*</sup>, Adam F L Hurlstone<sup>3</sup>, Peter E Clayton<sup>1</sup>, Adam Stevens<sup>1</sup>, Holly A Shiels<sup>2\*</sup>

## 4 **Affiliations:**

5 <sup>1</sup> Division of Developmental Biology and Medicine, School of Medical Sciences, Faculty of  
6 Biology, Medicine, and Health, University of Manchester, Manchester, UK.

7 <sup>2</sup> Division of Cardiovascular Sciences, School of Medical Sciences, Faculty of Biology Medicine  
8 and Health, University of Manchester, Manchester, UK.

9 <sup>3</sup> Division of Infection, Immunity, and Respiratory Medicine, School of Biological Sciences,  
10 Faculty of Biology, Medicine, and Health, University of Manchester, Manchester, UK.

11

12 BLE\* - [bridget.evans@postgrad.manchester.ac.uk](mailto:bridget.evans@postgrad.manchester.ac.uk) ORCID 0000-0001-7481-606X

13 AFLH - [adam.hurlstone@manchester.ac.uk](mailto:adam.hurlstone@manchester.ac.uk) ORCID 0000-0001-5260-9457.

14 PEC - [peter.clayton@manchester.ac.uk](mailto:peter.clayton@manchester.ac.uk) ORCID 0000-0003-1225-4537.

15 AS - [adam.stevens@manchester.ac.uk](mailto:adam.stevens@manchester.ac.uk) ORCID 0000-0002-1950-7325.

16 HAS\* - [holly.shiels@manchester.ac.uk](mailto:holly.shiels@manchester.ac.uk) ORCID 0000-0001-5223-5205.

17

18 **Key Words:** Metabolism, Respirometry, Oxygen Consumption, Zebrafish Larvae, Glucose,  
19 Method Comparison

20

## 21 **Summary statement**

22 The rate of glucose uptake is a valid alternative to respirometry for metabolic rate  
23 measurements in small larval fish.

24

25

26 **Abstract**

27 Respirometry is the current gold-standard for measuring metabolic rate. However, there is a  
28 growing need for metabolic rate measurements suitable for developmental studies,  
29 particularly in *Danio rerio*, where many important developmental stages occur at < 4 mm.  
30 While many metabolic studies rely on respirometry, the cost and complexity of the equipment  
31 limits its appeal in non-specialist labs, and background respiration becomes increasingly  
32 problematic as the size of the organism reduces. Here, glucose uptake was compared to stop-  
33 flow respirometry as an alternative measure of metabolic rate more suitable to the small scale  
34 required for developmental studies. A Passing-Bablok regression revealed the rate of glucose  
35 uptake can be considered equivalent to oxygen consumption as a measure of metabolic rate  
36 in *Danio rerio* larvae within a 95% limit of agreement. Therefore, glucose uptake is a valid  
37 alternative to the gold-standard in small organisms where conventional respirometry is  
38 problematic.

39

40

41

42

43

44

45

46

47

48

49

50

51

## 52 **Abbreviations**

|    |                 |                                   |
|----|-----------------|-----------------------------------|
| 53 | 2DG             | 2-Deoxyglucose                    |
| 54 | 2DG6P           | 2-Deoxyglucose-6-Phosphate        |
| 55 | ANOVA           | Analysis of Variance              |
| 56 | ATP             | Adenosine Triphosphate            |
| 57 | G6P             | Glucose-6-Phosphate               |
| 58 | G6PDH           | Glucose-6-Phosphate Dehydrogenase |
| 59 | MO <sub>2</sub> | Oxygen Consumption Rate           |
| 60 | MS-222          | Tricaine Methanesulfonate         |
| 61 | SEM             | Standard Error of Mean            |

## 62 **Introduction**

63 Metabolism encompasses a complex network of chemical reactions fundamental for  
64 sustaining life. Metabolic reactions convert chemicals from one form to another to release  
65 energy (e.g., respiration), generate molecules required for other processes (such as amino  
66 acids and nucleotides), and facilitate waste removal (including CO<sub>2</sub> and nitrogen).

67 Due to the complicated nature of whole-organism metabolism, reductionist approaches are  
68 often used to identify and measure single, key metabolic pathways (Darden, 2016). This  
69 enables the standardisation of metabolic rate measurements and facilitates comparisons  
70 between different studies. Pathways in the metabolic network are generally targeted for  
71 measurement under the assumption that a complex system is the sum of its parts, and thus  
72 each step is carried out in proportion to any other step, and that any limiting factor will limit  
73 the entire system as opposed to an individual step.

74 Key steps that have been targeted in metabolic research include the rate of substrate  
75 consumption, rate of generation and excretion of metabolites, and production of biproducts.  
76 For example, respirometry systems are employed to measure the rate of oxygen consumption  
77 at the level of the whole organism, the tissue, or the isolated mitochondria. Respirometry

78 may also be used to measure production of carbon dioxide (Tickle, Hutchinson and Codd,  
79 2018), while metabolite production can be detected in cells using analysers such as the Agilent  
80 Seahorse (Agilent, Santa Clara, California, US)(Müller *et al.*, 2019). Glucose tolerance testing  
81 is used to measure glucose uptake, while calorimetry, one of the oldest methods of  
82 estimating metabolic rate, measures heat production, a biproduct of many chemical reactions  
83 (Gillis *et al.*, 2015).

84 One of the most important metabolic pathways in biological systems is glucose metabolism,  
85 the mechanism by which glucose is processed to generate ATP, the primary unit of energy in  
86 living systems. Glucose is uptaken by respiring cells via glucose transporters and immediately  
87 phosphorylated to glucose-6-phosphate (G6P) by hexokinases. This prevents diffusion out of  
88 the cell, as G6P is membrane impermeable, accumulating G6P as a substrate for energy  
89 production. G6P is modified in multiple sequential reactions, ultimately generating one  
90 pyruvate molecule, and releasing 2 ATP per glucose molecule via glycolysis. This is the final  
91 step in anaerobic respiration. Pyruvate is subsequently transported from the cytosol into the  
92 mitochondria to enter the citric acid cycle and commence aerobic respiration. NADH  
93 generated by the citric acid cycle fuels the electron transport chain, ultimately generating a  
94 further 36 ATP. Glucose and oxygen are both limiting factors in glucose metabolism:

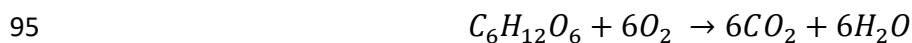

96 and can therefore act as indicators of metabolic rate.

97 While respirometry is considered the gold-standard for measuring metabolism, respirometry  
98 systems are often complex (see figure 1) and depending on the level of biological organization  
99 under investigation can require significant setup and validation time. They can also be costly,  
100 needing specialist equipment, particular for micro-respirometry (such as the Oroboros  
101 Oxygraph-2k and Agilent Seahorse XF Analyzer). While whole animal respirometry systems  
102 are less expensive, they require specialist knowledge to ensure reliability of experimental  
103 design and interpretation (Clark, Sandblom and Jutfelt, 2013). Common errors associated  
104 with whole animal measurements are compounded when considering embryos and larvae.  
105 Background bacterial respiration represents one of the greatest sources of interference in  
106 respirometry systems (Clark, Sandblom and Jutfelt, 2013)(M. B. S. Svendsen, Bushnell and  
107 Steffensen, 2016). While this can be negligible when compared with respiration of larger

108 organisms, the interference increases as the size of the organism decreases (M. B.S. Svendsen,  
109 Bushnell and Steffensen, 2016). While reducing the volume of the respirometry setup limits  
110 the impact of bacterial respiration, the volume and capacity of the system can only be reduced  
111 a finite amount and often requires more specialist, expensive equipment.

112 Glucose uptake assays, on the other hand, do not require specialist equipment to perform:  
113 only a plate reader, microscope, and reagents are needed. These assays can be adapted to 96  
114 well plate formats, enabling relatively high throughput, and higher granularity. A glucose  
115 uptake assay measures the rate of uptake of a glucose analogue, 2-deoxyglucose (2DG), which  
116 is transported into the cell by glucose transporters. Hexokinases phosphorylate 2DG into 2-  
117 deoxyglucose-6-phosphate (2DG6P), which is membrane impermeable and resistant to  
118 further modification, subsequently accumulating in the cell at the same rate as glucose  
119 uptake. Glucose-6-phosphate dehydrogenase converts 2DG6P into 6-  
120 phosphodeoxygluconate, reducing NADP<sup>+</sup> into NADPH. Reductases catabolise the conversion  
121 of pro-luciferin to luciferin, oxidising NADPH to NADP<sup>+</sup>, producing luminescence proportional  
122 to the rate of glucose uptake (see *Figure 2a*). Unlike respirometry systems, glucose uptake  
123 assays do not require specialist software to interpret and process data. The raw luminescence  
124 data can be used directly without the need for complicated respirometry calculations. Set-up  
125 time is minimal, as the assay can be performed as soon as the reagents arrive, and the cost is  
126 comparatively inexpensive compared to purchasing a respirometry setup.

127 Zebrafish (*Danio rerio*) are increasingly used in metabolic studies, and are an invaluable model  
128 organism for developmental research, featuring a rapid generation time, large spawn size,  
129 genetic tractability, and transparent embryos (Howe *et al.*, 2013). There is a growing body of  
130 literature incorporating metabolism into developmental studies in zebrafish (Dhillon *et al.*,  
131 2019)(Roy *et al.*, 2017)(Seth, Stemple and Barroso, 2013), and several important  
132 developmental stages occur in the zebrafish before 4 mm total body length, so a method for  
133 reliably measuring metabolism at smaller sizes would be beneficial. In zebrafish larvae the  
134 yolk serves as a primary energy store. The developing circulatory system runs directly across  
135 the yolk, into the heart, dorsal aorta, caudal vein, and back to the yolk in one continuous  
136 circuit. Nutrients dissolve into the bloodstream when passing through the yolk, which are  
137 then absorbed by actively respiring cells. As the yolk is readily accessible, a glucose analogue

138 can be introduced easily into the system, provide the means to assess rate of glucose uptake  
139 as an index of metabolic rate.

140 Here, a glucose uptake assay in 96 hours post-fertilisation (hpf) zebrafish larva, adapted from  
141 an existing cell-culture protocol, is compared with whole-organism metabolic rate measured  
142 using respirometry. Protocol comparison shows the two methods are equivalent, thus the  
143 glucose uptake assay can be used as a new proxy for whole animal metabolism in larval fish.

## 144 **Materials and Methods**

### 145 **Zebrafish Husbandry**

146 An established line of AB Notts zebrafish from the Biological Services Unit of the University of  
147 Manchester were used in this study. Adult zebrafish were housed under standard conditions  
148 ( $\approx 28^{\circ}\text{C}$ ; 14 h light/10 h dark cycle; stocking density  $< 5$  fish per litre). Breeding pairs were  
149 separated and housed in breeding tanks overnight at a ratio of one male to one female.  
150 Dividers were removed at the start of the following light cycle. Embryos were collected after  
151 one hour of free breeding and incubated in embryo water (Instant Ocean salt  $60\ \mu\text{gml}^{-1}$ ,  $2$   
152  $\mu\text{gml}^{-1}$  methylene blue (Dunn, 2018)) at  $28^{\circ}\text{C}$  at a stocking density of  $< 50$  embryos per petri  
153 dish. Unfertilised embryos were removed after 24 hours and embryo water was refreshed  
154 every 24 hours.

### 155 **Caffeine Treatment**

156 Caffeine is a well-known stimulant inducing multiple effects on the organism, including  
157 increased heart rate, metabolic rate, and locomotion (Rana *et al.*, 2010)(Abdelkader *et al.*,  
158 2012)(Santos *et al.*, 2017)(Chen *et al.*, 2008). To generate embryos with differing metabolic  
159 rates, varying concentrations of caffeine were dissolved in embryo water ( $0\ \text{mgL}^{-1}$ ,  $5\ \text{mgL}^{-1}$ ,  
160 and  $25\ \text{mgL}^{-1}$ ). Concentrations were selected to reliably induce a metabolic effect (Rana *et al.*,  
161 2010)(Abdelkader *et al.*, 2012)(Santos *et al.*, 2017)(Chen *et al.*, 2008). Prior to measuring  
162 indices of metabolism, larvae were randomly assigned to petri dishes containing one of the  
163 three concentrations of caffeine and returned to the  $28^{\circ}\text{C}$  incubator for two hours. Larvae  
164 were subsequently assigned to either stop-flow respirometry or the glucose uptake assay.  
165 Age in hpf has a notable impact on metabolic rate (Dhillon *et al.*, 2019), so experiments were  
166 performed on age matched separate individuals.

## 167 **Oxygen Consumption via Closed-Circuit Stop-Flow Respirometry**

168 In order to accurately measure very small changes in oxygen saturation, a closed-circuit stop-  
169 flow respirometer was designed (*Figure 1*) (M. B.S. Svendsen, Bushnell and Steffensen, 2016),  
170 with the volume of the respirometer kept to a minimum (3 ml). Flo-thru probe vessels (*Figure*  
171 *1.6*) (Loligo Systems, 3-6 mm probe/10 mm tube size) were adapted for use as respirometry  
172 chambers. Single oxygen spots (*Figure 1.7*) (Pyroscience, Aachen, Germany) were placed at  
173 the base of each chamber, paired with optical oxygen sensors (*Figure 1.8*) (Pyroscience,  
174 Aachen, Germany) fed through the top of the chamber, calibrated according to the  
175 manufacturer's instructions. A stop-flow pump was attached to each chamber (*Figure 1.4*),  
176 controlled by a Cleware USB-Switch (*Figure 1.2*) (Cleware GmbH, Germany) programmable  
177 switch and AquaResp v.3 software (*Figure 1.13*) (AquaResp, v3, Python 3.6, (Svendsen,  
178 Bushnell and Steffensen, 2019)). Cycling parameters were set to 60 s, 10 s, 300 s, (flush, wait,  
179 measure). This was sufficient flush time to replace all the water within the chamber with  
180 oxygenated water, and a sufficient wait time to ensure complete mixing within the chamber.  
181 To maintain a constant temperature of  $28^{\circ}\text{C} \pm 0.3^{\circ}\text{C}$  (*Figure 1.1*), the respirometry system was  
182 immersed in a recirculation chamber (*Figure 1.3*) under constant aeration (*Figure 1.10*).  
183 During flushing, water was pumped from this water bath into the chambers. Oxygen  
184 saturation within the chambers and water temperature (*Figure 1.11*) was recorded using a  
185 FireStingO<sub>2</sub> Fiber-optic oxygen and temperature meter (*Figure 1.12*) (PyroScience GmbH,  
186 Aachen, Germany) and Pyroscience Pyro Oxygen Logger (PyroScience GmbH, Aachen,  
187 Germany, v3.312, firmware 3.07).

188 Prior to each trial, the respirometer was filled with water matching the treatment group.  
189 Individual zebrafish larvae (96 hpf) were placed into a random chamber and allowed to  
190 acclimate for 30 minutes prior to the first trial. Data are represented as the mean of three  
191 trials per larvae ( $n = 10$  per treatment). Oxygen consumption was measured on empty  
192 chambers immediately before and after each set of trials to account for background bacterial  
193 respiration.

194 Regression curves were automatically generated by AquaResp and oxygen consumption was  
195 extracted and normalised against the length of the trial and volume of the respirometry

196 chamber according to the following equation, where  $7.8 \text{ mgL}^{-1}$  is the maximum dissolved  
197 oxygen in  $28^\circ\text{C}$  desalinated water:

$$198 \quad \text{Oxygen consumption (mgO}_2\text{m}^{-1}\text{g}^{-1}) = \frac{\Delta\text{O}_2 \times 7.8 \text{ mgL}^{-1} \times \text{chamber volume (L)}}{\text{time (m)} \times \text{mass (g)}}$$

## 199 **Glucose Uptake Assay**

200 An adapted Glucose Uptake-Glo™ Assay (Promega, Wisconsin, USA) was performed on 96 hpf  
201 zebrafish to assess differences in the rate of glucose uptake between treatment groups.  
202 Following the incubation in caffeine solution, larvae were immobilised in  $0.7 \mu\text{M}$  MS-222 (no  
203 impact on heart rate (Zakaria *et al.*, 2018)) and methylcellulose. Individual zebrafish larvae (n  
204 = 10 per treatment) were injected with 1 mM 2DG (*Figure 2.1*) directly into the yolk and  
205 recovered in caffeinated water for 30 minutes (*Figure 2.2*), allowing the 2DG to disperse into  
206 the yolk and be transported into the cells via the bloodstream. Larvae were subsequently  
207 terminated in MS-222 ( $500 \text{ mgL}^{-1}$ ), transferred to a 96 well plate, and homogenised in acid  
208 detergent with a fine gauge needle to terminate glucose uptake and destroy NADPH present  
209 in the sample. Each well was neutralised with a high pH buffer and incubated with detection  
210 reagent (G6PDH, NADP<sup>+</sup>, reductase, UltraGlo™ recombinant luciferase, proluciferin) for 30  
211 minutes. G6PDH oxidises accumulated 2DG6P to 6-phosphodeoxygluconate, reducing NADP<sup>+</sup>  
212 to NADPH. Reductase catalyses the production of luciferin from proluciferin, oxidising NADPH  
213 to NADP<sup>+</sup> (*Figure 2.3*). Luciferin acts as a substrate for the UltraGlo™ recombinant luciferase  
214 to generate luminescence (*Figure 2.4*). As all native NADPH is removed from the sample  
215 during the lysis step, luminescence  $\leftrightarrow$  NADPH  $\leftrightarrow$  2DG6P accumulation  $\leftrightarrow$  glucose uptake.  
216 The luminescent signal is therefore proportional to the rate of glucose uptake. To limit the  
217 impact of native glucose interference on the signal, sham-injected larvae were included as a  
218 control to adjust for background luminescence. Sham-injected larvae received an injection of  
219 phenol red, a common innocuous tracer used in microinjection solutions, in place of the 2DG.  
220 An empty well was included per row to further minimise background noise. Luminescence  
221 was measured on a Synergy™ H1 Microplate reader (BioTek Instruments, Inc., Winooski, VT,  
222 USA, software version 2.07.17) with 8 readings per well, adjusted against the background  
223 signal.

## 224 **Statistical Tests**



225 Data were imported into GraphPad Prism (v7.04) for statistical analysis and converted to  
226 logarithmic values. All data were ROUT tested for outliers (Motulsky and Brown, 2006) and  
227 subject to D'Agostino and Pearson normality tests. Post-hoc power calculations were  
228 performed to confirm sample sizes were sufficient, where  $\alpha = 0.05$ . One-way analysis of  
229 variance (ANOVA) was used to determine if there was a significant difference between the  
230 caffeine treatments within a given metabolic index.

231 To compare between the two methods of assessing metabolism, Passing-Bablok regression  
232 analysis was used, where a regression line is fitted for the alternative method against the  
233 gold-standard (Bablok, 1983; Bilic-Zulle, 2011). The Passing-Bablok regression requires the  
234 data to be linear, and states that if a structural relationship exists between two methods, it  
235 can be described by the linear equation  $y = \alpha + \beta x$ . If the 95% confidence intervals of  $\alpha$  include  
236 0 and  $\beta$  include 1, the two methods are comparable within the given range. If the confidence  
237 interval of  $\alpha$  does not include 0, there is a systematic difference between the methods, and if  
238 the confidence interval of  $\beta$  does not include 1, there is a proportional difference between  
239 the methods. The Passing-Bablok regression 95% confidence bounds were calculated using  
240 the jack-knife method. The regression plot is presented alongside a Bland-Altman plot of the  
241 residuals, together with the bias and limits of agreement (Giavarina, 2015). The bias ( $\bar{d}$ ) was  
242 calculated as the mean of the differences between the two methods. The limits of agreement  
243 were calculated as:

$$244 \quad \text{Upper limit: } \bar{d} + 1.96\sigma \quad \text{Lower limit: } \bar{d} - 1.96\sigma$$

245 where  $n$  is the number of individuals (30) and  $\sigma$  is the standard deviation. The upper and  
246 lower 95% confidence intervals were calculated as:

$$247 \quad LoA \pm t_{\alpha-1, n-1} \times \sqrt{var(LoA)}$$

248 Where:

$$249 \quad Var(LoA) = \frac{1}{n} + \sigma^2 \frac{1.96^2}{2(n-1)}$$

250 The residuals were plotted as the percentage difference [(Respirometry – Glucose  
251 Uptake)/(Respirometry)\*100] vs the averages to account for the increase in variability as  
252 the magnitude of the measurement increased (Giavarina, 2015).

253 To calculate the biological power, the literature was reviewed to ascertain normal variation  
254 between individual zebrafish larvae and the expected percentage difference between  
255 groups with different metabolic rates. PASS 2021 (Power Analysis & Sample Size, NCSS  
256 Statistical Software, Utah, USA, v21.0.2) (Bland and Altman, 2010; Lu *et al.*, 2016) was used  
257 to calculate the power associated with the defined maximum allowable difference at a  
258 confidence level of 85%.

## 259 **Results and Discussion**

260 Metabolic rate measured by whole animal oxygen consumption and by glucose uptake were  
261 elevated with increasing caffeine concentration (*Figure 3*). Oxygen consumption sequentially  
262 and significantly increased between control, 5 mgL<sup>-1</sup>, and 25 mgL<sup>-1</sup> (*Figure 3a*), reflecting the  
263 increase in movement, heart rate, and metabolic demand induced by caffeine exposure.  
264 Oxygen is required for aerobic respiration and can be considered a limiting factor of  
265 respiratory rate. Therefore, the increase in oxygen consumption observed with caffeine  
266 exposure in 96hpf zebrafish larva can be considered a reliable measure of increasing  
267 organismal metabolic rate.

268 Similarly, glucose accumulation in zebrafish larvae significantly increased as caffeine  
269 concentration increased (*Figure 3b*). As glucose is the initial substrate of glycolytic respiration,  
270 glucose is also a limiting factor of metabolism. Therefore, akin to changes in oxygen, glucose  
271 accumulation can be considered a measure of whole animal metabolic rate. While aerobic  
272 respiration generates the majority of the ATP produced during glucose metabolism (36 units  
273 ATP per glucose, 6 units ATP per oxygen), anaerobic respiration also contributes to overall  
274 energy production (2 units ATP per glucose [anaerobic] vs 36 units ATP per glucose [aerobic]).  
275 Stop-flow respirometry measures changes in oxygen consumption and can thus only serve as  
276 an indicator of aerobic metabolism. Glucose accumulation measures the limiting factor  
277 earlier in the pathway and thus can account for both aerobic and anaerobic metabolism. The  
278 differences in percentage change between treatment groups observed in the two methods is  
279 likely due to this difference in scope of the two methods: aerobic (respirometry) and aerobic  
280 + anaerobic (glucose accumulation).

281 The Passing-Bablok regression was used to compare and assess the equivalence of the two  
282 methods. D'Agostino and Pearson normality testing of each data group showed data were

283 from a normal distribution ( $p > 0.1$ ). Regression of the raw data (*Figure 3c*) gave the  
284 following regression line:

$$285 \quad y = 3359.33x - 18857.38$$

286 95% confidence intervals:  $-44924.00 \leq \alpha \leq -2252.65$  and  $2124.29 \leq \beta \leq 5179.28$

287 As the 95% confidence intervals for  $\alpha$  do not include 0 and the intervals for  $\beta$  do not include  
288 1, there is a proportional and systematic difference between the two methods. This is  
289 expected, as the two methods use different units, and can be corrected for by scaling the  
290 arbitrary glucose accumulation data by 0.00048. The parameters of the scaled data for the  
291 Passing-Bablok regression were:

$$292 \quad y = 1.20x - 2.81$$

293 95% confidence intervals:  $-8.50 \leq \alpha \leq 2.87$  and  $0.28 \leq \beta \leq 1.79$

294 As both  $\alpha = 0$  and  $\beta = 1$  are true at a confidence of 95%, it can be concluded that the two  
295 methods are comparable and interchangeable.

296 The residuals were plotted as percentage difference vs average of the two methods alongside  
297 the bias (0.85% {-8.52, 10.21}) and the upper (49.99%) and lower (-48.30%) limits of  
298 agreement in a Bland-Altman plot (*Figure 3d*). The 95% confidence interval of the bias  
299 included zero, indicating there is no statistically significant bias, confirmed by a two-tailed t-  
300 test ( $p = 0.893$ ). As shown in *Figure 3d*, 100% of the data fell between the upper and lower  
301 limits of agreement, suggesting the residuals are distributed around the bias line. Finally,  
302 existing literature was used to assess the biological power of the comparison. As metabolic  
303 rate can vary between zebrafish embryos by up to approximately 50% (Barrionuevo and  
304 Burggren, 1999; Bang, Gronkjaer and Malte, 2004), a difference of this size can be considered  
305 within normal metabolic variation and not biologically significant. As shown in *Figure 3d*, the  
306 data falls within the 95% limits of agreement, suggesting the differences between these two  
307 methods are not likely to be biologically relevant. To determine the power of the method, a  
308 further 10% difference in metabolic rate was set as the minimum requirement for biological  
309 significance (60% total). The power was subsequently calculated using the approximate  
310 maximum allowable difference of 59%. This study achieves a power of 94.99%, based on a  
311 mean difference of 0.85% and a standard deviation of 25.07%, suggesting the difference

312 between the two methods is unlikely to mask biologically relevant differences between  
313 groups, and the methods can likely be used interchangeably.

314 In summary, regression analysis shows that glucose accumulation and oxygen consumption  
315 measurements can be considered equivalent when measuring differences in metabolic rate  
316 induced by caffeine exposure in larval zebrafish. While respirometry yields information on  
317 aerobic metabolic rate and has been readily used on a variety of organisms, the practical and  
318 financial aspects of setting up and validating a respirometry system reduces their appeal,  
319 particularly for very small animals. Glucose accumulation, though limited to smaller  
320 organisms, represents a readily accessible, rapid, and simple alternative to stop-flow  
321 respirometry in larval fish species.

## 322 **Acknowledgements**

323 The authors would also like to acknowledge the Biological Services Unit at the University of  
324 Manchester for housing and maintaining the zebrafish lines.

## 325 **Competing Interests**

326 The authors declare the research was conducted in the absence of any conflicts of interest.

## 327 **Author contributions**

328 **Bridget Evans:** Conceptualisation, methodology, validation, formal analysis, investigation,  
329 writing – original draft preparation, review, and editing, and visualisation.

330 **Holly Shiels:** Conceptualisation, writing – review and editing, supervision.

331 **Adam Hurlstone:** Conceptualisation, resources, writing – review and editing, supervision.

332 **Adam Stevens:** writing – review, supervision.

333 **Peter Clayton:** writing – review, supervision.

## 334 **Funding**

335 This work was funded by the Biotechnology and Biological Sciences Research Council at the  
336 University of Manchester, Manchester, UK.

## 337 **References**

- 338 Abdelkader, T. S. *et al.* (2012) 'Exposure time to caffeine affects heartbeat and cell damage-  
339 related gene expression of zebrafish *Danio rerio* embryos at early developmental stages',  
340 *Journal of Applied Toxicology*. John Wiley & Sons, Ltd, 33(11), p. n/a-n/a. doi:  
341 10.1002/jat.2787.
- 342 Bablok, W. (1983) 'Ein neues biometrisches Verfahren zur Überprüfung der Gleichheit von  
343 Meßwerten von zwei analytischen Methoden: Anwendung von linearen  
344 Regressionsverfahren bei Methodenvergleichsstudien in der Klinischen Chemie, Teil I',  
345 *Clinical Chemistry and Laboratory Medicine*. Walter de Gruyter, Berlin / New York, 21(11),  
346 pp. 709–720. doi: 10.1515/cclm.1983.21.11.709.
- 347 Bang, A., Gronkjaer, P. and Malte, H. (2004) 'Individual variation in the rate of oxygen  
348 consumption by zebrafish embryos', *Journal of Fish Biology*. John Wiley & Sons, Ltd, 64(5),  
349 pp. 1285–1296. doi: 10.1111/j.0022-1112.2004.00391.x.
- 350 Barrionuevo, W. R. and Burggren, W. W. (1999) *O<sub>2</sub> consumption and heart rate in*  
351 *developing zebrafish (Danio rerio): influence of temperature and ambient O<sub>2</sub>*.
- 352 Bilic-Zulle, L. (2011) 'Comparison of methods: Passing and Bablok regression', *Biochemia*  
353 *Medica*. Biochemia Medica, Editorial Office, 21(1), pp. 49–52. doi: 10.11613/BM.2011.010.
- 354 Bland, J. M. and Altman, D. G. (2010) 'Statistical methods for assessing agreement between  
355 two methods of clinical measurement', *International Journal of Nursing Studies*, pp. 931–  
356 936. doi: 10.1016/j.ijnurstu.2009.10.001.
- 357 Chen, Y. H. *et al.* (2008) 'Movement disorder and neuromuscular change in zebrafish  
358 embryos after exposure to caffeine', *Neurotoxicology and Teratology*. Neurotoxicol Teratol,  
359 30(5), pp. 440–447. doi: 10.1016/j.ntt.2008.04.003.
- 360 Clark, T. D., Sandblom, E. and Jutfelt, F. (2013) 'Aerobic scope measurements of fishes in an  
361 era of climate change: Respirometry, relevance and recommendations', *Journal of*  
362 *Experimental Biology*. J Exp Biol, pp. 2771–2782. doi: 10.1242/jeb.084251.
- 363 Darden, L. (2016) 'Reductionism in Biology', in *eLS*. John Wiley & Sons, Ltd, pp. 1–7. doi:  
364 10.1002/9780470015902.a0003356.pub2.

- 365 Dhillon, S. S. *et al.* (2019) 'Metabolic profiling of zebrafish embryo development from  
366 blastula period to early larval stages', *PLOS ONE*. Edited by D. Monleon. Public Library of  
367 Science, 14(5), p. e0213661. doi: 10.1371/journal.pone.0213661.
- 368 Dunn, N. (2018) *Raising Larvae in the Zebrafish International Resource Center Autonursery*.  
369 Available at:  
370 <https://wiki.zfin.org/display/prot/Raising+Larvae+in+the+Zebrafish+International+Resource>  
371 [+Center+Autonursery](#) (Accessed: 18 June 2018).
- 372 Giavarina, D. (2015) 'Understanding Bland Altman analysis Lessons in biostatistics',  
373 *Biochemia Medica*, 25(2), pp. 141–51. doi: 10.11613/BM.2015.015.
- 374 Gillis, T. E. *et al.* (2015) 'Characterizing the metabolic capacity of the anoxic hagfish heart',  
375 *Journal of Experimental Biology*. Company of Biologists Ltd, 218(23), pp. 3754–3761. doi:  
376 10.1242/jeb.125070.
- 377 Howe, K. *et al.* (2013) 'The zebrafish reference genome sequence and its relationship to the  
378 human genome', *Nature*, 496(7446), pp. 498–503. doi: 10.1038/nature12111.
- 379 Lu, M. J. *et al.* (2016) 'Sample Size for Assessing Agreement between Two Methods of  
380 Measurement by Bland-Altman Method', *International Journal of Biostatistics*. Walter de  
381 Gruyter GmbH, 12(2). doi: 10.1515/ijb-2015-0039.
- 382 Motulsky, H. J. and Brown, R. E. (2006) 'Detecting outliers when fitting data with nonlinear  
383 regression - A new method based on robust nonlinear regression and the false discovery  
384 rate', *BMC Bioinformatics*. BioMed Central, 7(1), p. 123. doi: 10.1186/1471-2105-7-123.
- 385 Müller, M. E. *et al.* (2019) 'Mitochondrial Toxicity of Selected Micropollutants, Their  
386 Mixtures, and Surface Water Samples Measured by the Oxygen Consumption Rate in Cells',  
387 *Environmental Toxicology and Chemistry*. Wiley Blackwell, 38(5), pp. 1000–1011. doi:  
388 10.1002/etc.4396.
- 389 Rana, N. *et al.* (2010) 'Caffeine-Induced Effects on Heart Rate in Zebrafish Embryos and  
390 Possible Mechanisms of Action: An Effective System for Experiments in Chemical Biology',  
391 *Zebrafish*, 7(1). doi: 10.1089/zeb.2009.0631.
- 392 Roy, U. *et al.* (2017) 'Metabolic profiling of zebrafish (*Danio rerio*) embryos by NMR

- 393 spectroscopy reveals multifaceted toxicity of  $\beta$ -methylamino-L-alanine (BMAA)', *Scientific*  
394 *Reports*. Nature Research, 7(1), pp. 1–12. doi: 10.1038/s41598-017-17409-8.
- 395 Santos, L. C. *et al.* (2017) 'Caffeine Dose-Response Relationship and Behavioral Screening in  
396 Zebrafish', in *The Question of Caffeine*. InTech. doi: 10.5772/intechopen.68341.
- 397 Seth, A., Stemple, D. L. and Barroso, I. (2013) 'The emerging use of zebrafish to model  
398 metabolic disease', *Disease Models & Mechanisms*, 6(5), pp. 1080–1088. doi:  
399 10.1242/dmm.011346.
- 400 Svendsen, M. B. S., Bushnell, P. G. and Steffensen, J. F. (2016) 'Design and setup of  
401 intermittent-flow respirometry system for aquatic organisms', *Journal of Fish Biology*.  
402 Blackwell Publishing Ltd, 88(1), pp. 26–50. doi: 10.1111/jfb.12797.
- 403 Svendsen, M. B.S., Bushnell, P. G. and Steffensen, J. F. (2016) 'Design and setup of  
404 intermittent-flow respirometry system for aquatic organisms', *Journal of Fish Biology*.  
405 Blackwell Publishing Ltd, 88(1), pp. 26–50. doi: 10.1111/jfb.12797.
- 406 Svendsen, M. B. S., Bushnell, P. G. and Steffensen, J. F. (2019) 'AquaResp'. doi:  
407 <http://doi.org/10.5281/zenodo.2584015>.
- 408 Tickle, P. G., Hutchinson, J. R. and Codd, J. R. (2018) 'Energy allocation and behaviour in the  
409 growing broiler chicken', *Scientific Reports*. Nature Publishing Group, 8(1), pp. 1–13. doi:  
410 10.1038/s41598-018-22604-2.
- 411 Zakaria, Z. Z. *et al.* (2018) 'Using Zebrafish for Investigating the Molecular Mechanisms of  
412 Drug-Induced Cardiotoxicity', *BioMed Research International*. Hindawi Limited. doi:  
413 10.1155/2018/1642684.
- 414
- 415

416 **Figures**

**Figure 1**

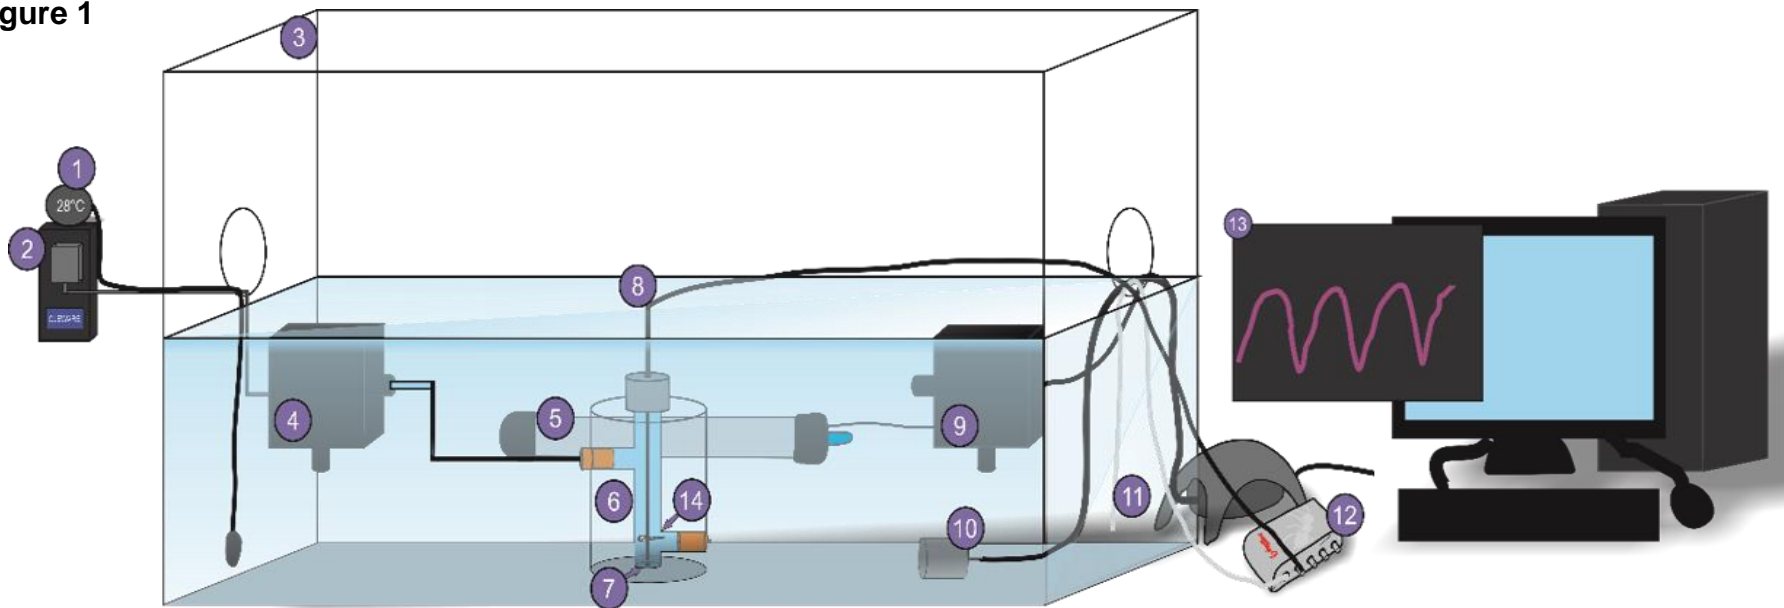

417

418 **Figure 1: Stop-flow respirometry setup for larval fish.** 1. Temperature probe. 2. AquaResp-controlled USB switch. 3. Recirculation tank. 4. Stop-  
419 flow pump controlled by USB switch. 5. Water heater (28°C). 6. Respirometry chamber. 7. Oxygen spot. 8. Fiberoptic probe. 9. Recirculation  
420 pump. 10. Air stone. 11. Temperature probe. 12. FireStingO<sub>2</sub> Oxygen and Temperature Logger. 13. AquaResp software v.3. Larvae (14.) are placed  
421 in the respirometry chamber and acclimated for one hour before measurements begin. AquaResp controls the stop-flow pump and logger to  
422 cycle through a series of flush-wait-measure steps (60 s, 10 s, 300 s), generating oxygen saturation curves. AquaResp generates regression curves  
423 and outputs MO<sub>2</sub> data for each cycle.



**Figure 2**

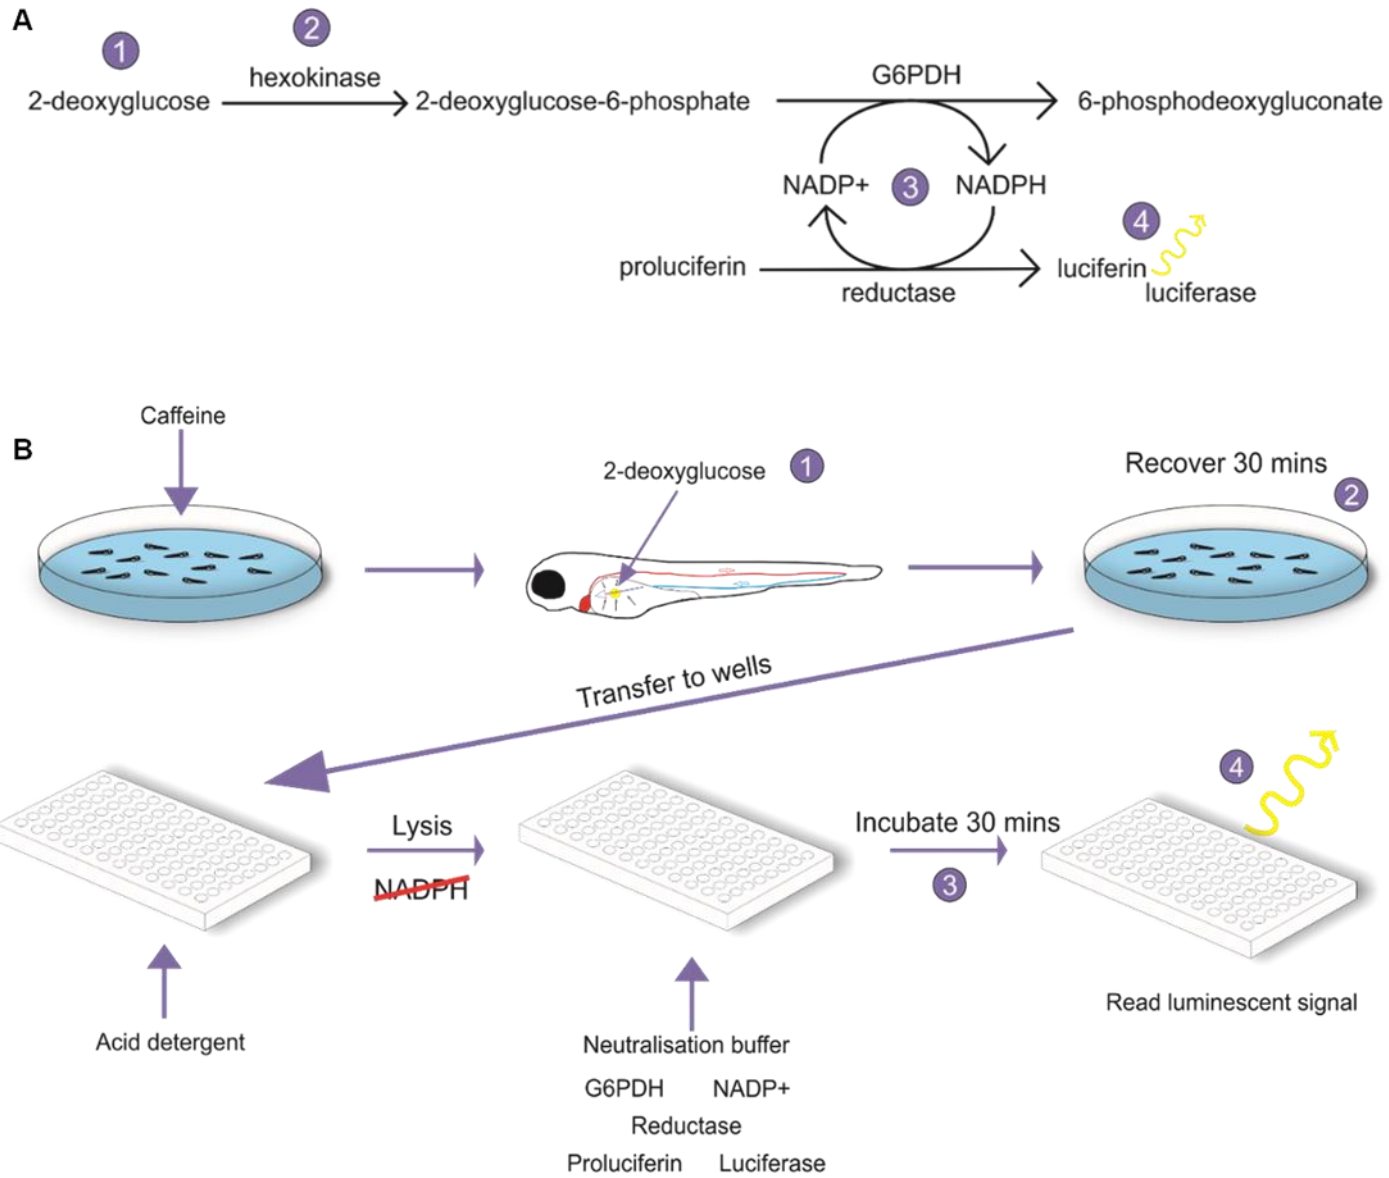

425 **Figure 2: Glucose uptake assay protocol. 2a.** Equation detailing the reactions involved in a glucose uptake assay. **2b.** Experimental setup of a  
426 glucose assay performed on 96 hpf zebrafish larvae exposed to different concentrations of caffeine. Larvae are injected with 2-deoxyglucose  
427 into the yolk (yellow area) and recovered for 30 minutes. Larvae are transferred to individual wells and lysed with acid detergent to stop further  
428 glucose uptake, destroy any native NADPH, and homogenise the sample. Neutralisation and detection buffer are added, and samples are  
429 incubated while the luminescent signal is generated. After 30 minutes, luminescence is measured on a plate reader.

430

431

432

433

434

435

436

437

438

439

440

Figure 3

441

442

443

444

445

446

447

448

449

450

451

452

453

454

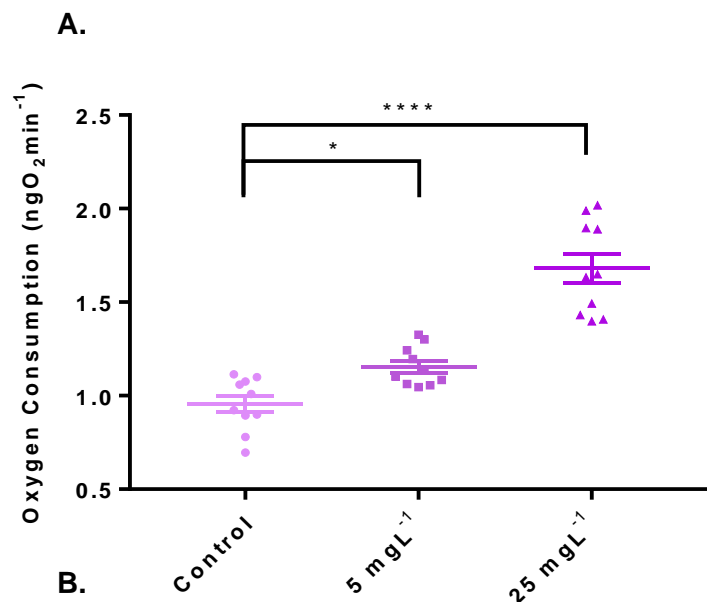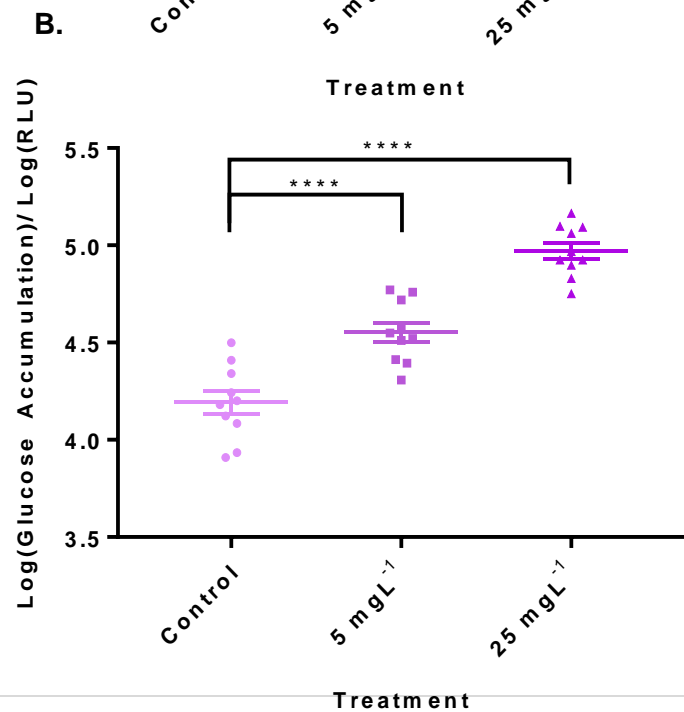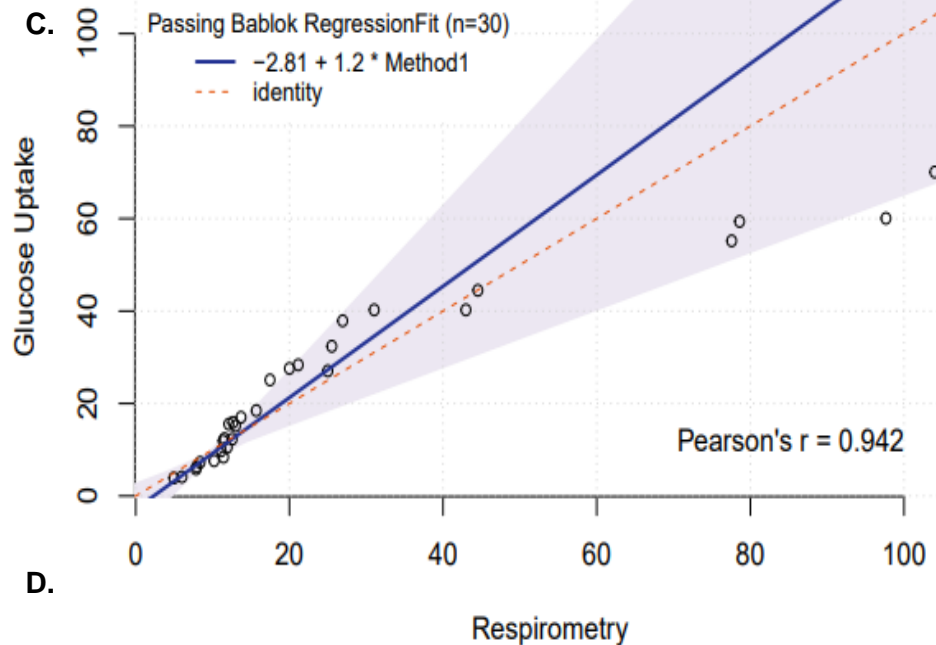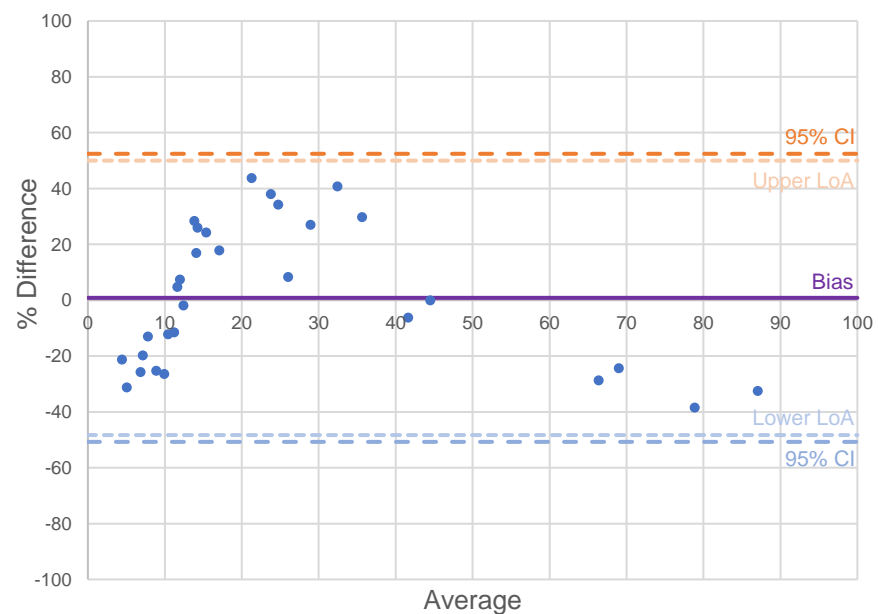

455 **Figure 3: Comparison of metabolic rate as measured by stop-flow respirometry (3a) and glucose uptake (3b), Passing-Bablok comparison of**  
456 **the two methods (3c), and Bland-Altman residuals plot (3d).** 96 hpf zebrafish larvae were incubated in one of three caffeine concentrations (0  
457  $\text{mgL}^{-1}$ , 5  $\text{mgL}^{-1}$ , and 25  $\text{mgL}^{-1}$ ) to generate groups with differing metabolic rates. **3a.** Oxygen consumption was measured by stop-flow  
458 respirometry in milligrams of oxygen per minute per fish ( $n = 10$ ). There was a significant increase in oxygen consumption between control and  
459 caffeine treated zebrafish larvae, with oxygen consumption increasing with increasing concentrations of caffeine (\* = 0.0429. \*\*\*\* <0.0001).  
460 **3b.** The rate of glucose uptake was measured using a Glucose-Uptake Glo™ Assay. There was a significant increase in luminescence between  
461 control and caffeine treated zebrafish larvae, with higher levels of luminescence correlating with higher concentrations of caffeine (\*\*\*\*  
462 <0.0001). All data are represented as individual data points with mean and SEM bars. Significance was determined by one-way ANOVA. **3c.**  
463 Passing-Bablok Regression of respirometry vs. scaled glucose assay data, including regression line and 95% confidence limits.  $y = 2.81 + 1.20x$ ,  
464 95% confidence intervals  $-8.50 \leq \alpha \leq 2.87$  and  $0.28 \leq \beta \leq 1.79$ . **3d.** Bland-Altman plot of residuals of the log values. Bias = 0.85%, upper limit of  
465 agreement = 49.99%, lower limit of agreement = -48.33%, upper confidence interval = 52.43%, lower confidence interval = -50.74%.
